# Supplementary material for: TaAPO-A1, an ortholog of rice ABERRANT PANICLE ORGANIZATION 1, is associated with total spikelet number per spike in elite European hexaploid winter wheat (Triticum aestivum L.) varieties
Source: PubMed Central journal article supplement (PMC6761172; doi:10.1038/s41598-019-50331-9), 2019-09-25
Supplement: 41598_2019_50331_MOESM1_ESM.pdf [file 41598_2019_50331_MOESM1_ESM.pdf]

Article type: Research article

***TaAPO-A1*, an ortholog of rice *ABERRANT PANICLE ORGANIZATION 1*, is associated with total spikelet number per spike in elite European hexaploid winter wheat (*Triticum aestivum* L.) varieties**

Quddoos H. Muqaddasi<sup>1\*</sup>, Jonathan Brassac<sup>1</sup>, Ravi Koppolu<sup>1</sup>, Jörg Plieske<sup>2</sup>, Martin W. Ganal<sup>2</sup>, and Marion S. Röder<sup>1</sup>

<sup>1</sup>Leibniz Institute of Plant Genetics and Crop Plant Research (IPK), Corrensstraße 3, D-06466 Stadt Seeland, OT Gatersleben, Germany.

<sup>2</sup>TraitGenetics GmbH, Am Schwabeplan 1b, D-06466 Stadt Seeland, OT Gatersleben, Germany.

\*Corresponding author: [muqaddasi@ipk-gatersleben.de](mailto:muqaddasi@ipk-gatersleben.de)

**Supplementary figures**

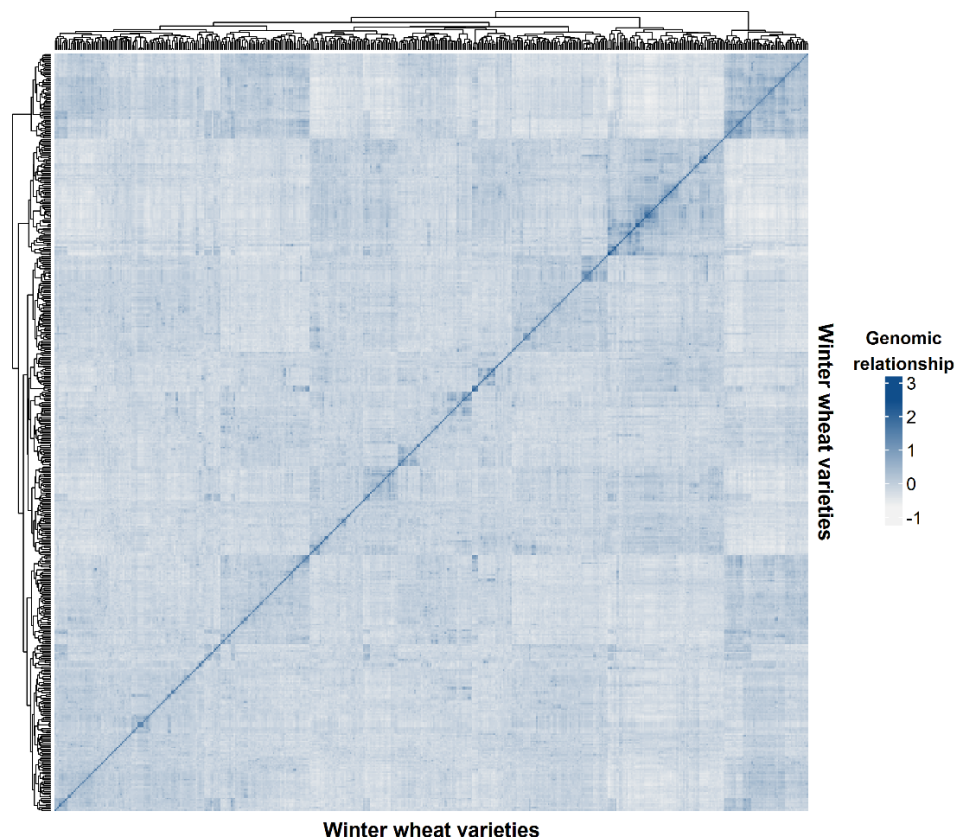

**Figure S1. Heat map of the genomic relationships among 518 elite European winter wheat varieties based on 39,908 marker genotypes.** The varieties are ordered according to hierarchical cluster analysis. The scale of genomic relationships is given in the figure.

**(a)**

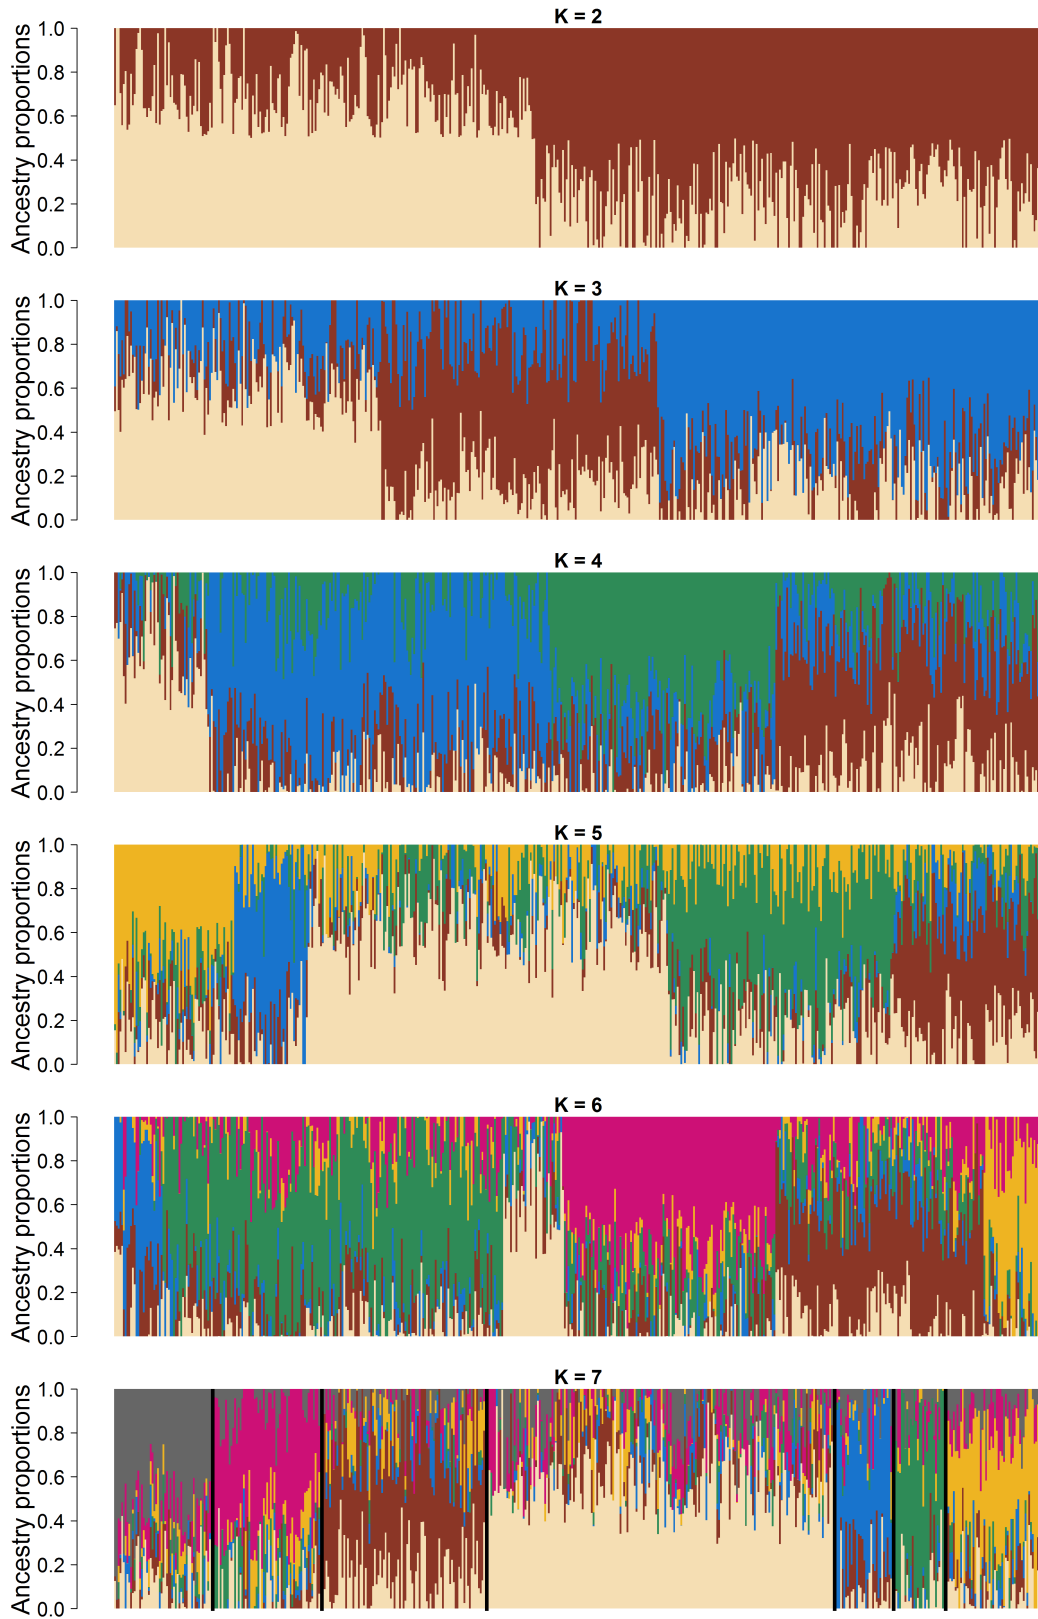

**(b)**

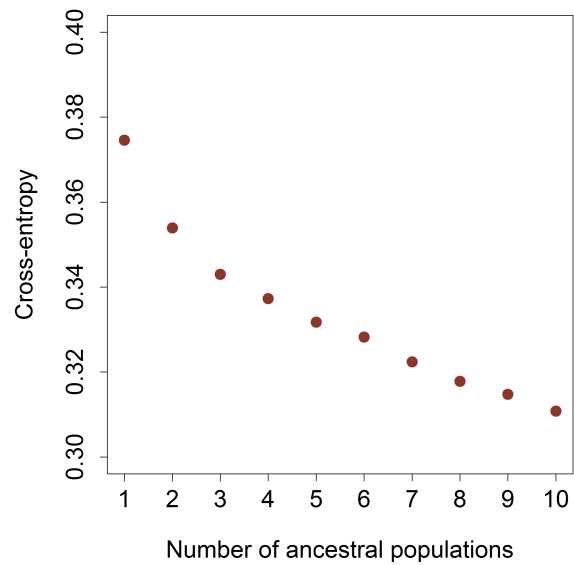

**Figure S2. Population structure analysis of the 518 elite European winter wheat varieties based on 39,809 marker genotypes. (a) Bar plots show the existence of admixed sub-populations, (b) The cross-entropy plot shows that there exists a minimal sub-structuring in the panel.**

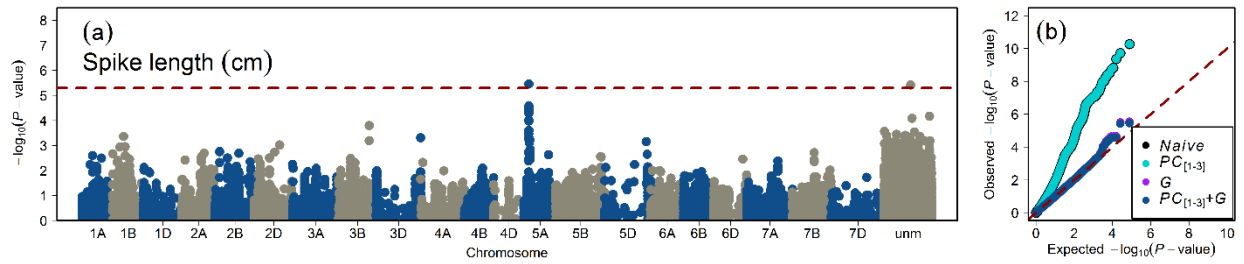

**Figure S3. Summary of the genome-wide association studies (GWAS) of spike length in the population of 518 elite European winter wheat varieties. (a) Manhattan plot shows the distribution of markers significance  $-\log_{10}(P - \text{value})$  along the chromosomes.** The correction for population stratification and familial relatedness was performed by using the first three principal components ( $PC_{[1-3]}$ ) and an additive genomic relationship matrix ( $G$ ) in a linear mixed-effect model. The red dashed line marks the multiple testing criteria of false discovery rate (FDR)  $< 0.10$ , **(b) Quantile-quantile plot showing the distribution of observed versus expected (red dashed line)  $-\log_{10}(P - \text{value})$ .** The naïve model represents the GWAS without the correction of population structure, the  $PC_{[1-3]}$  model represents the population structure corrected with the first three  $PC$ s, the  $G$  model represents the familial relatedness corrected with a genomic relationship matrix, and the  $PC_{[1-3]}+G$  model represents the population structure and familial relatedness corrected with the  $PC$ s and the  $G$  matrix. The color code for different models is given in the figure legend.

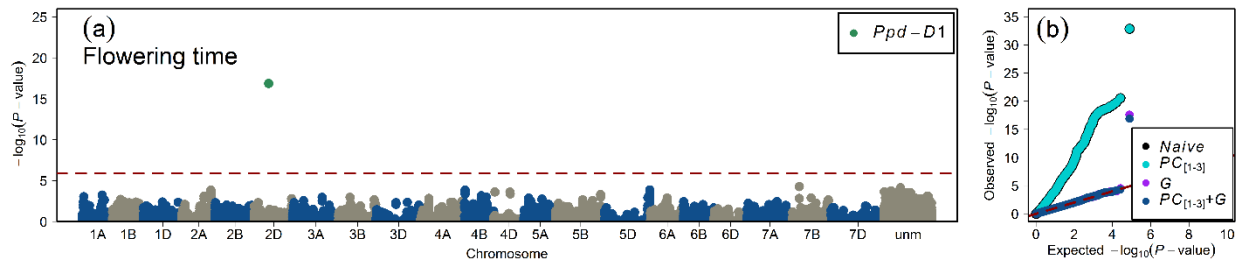

**Figure S4: Summary of the genome-wide association studies (GWAS) of flowering time in the population of 518 elite European winter wheat varieties. (a) Manhattan plot shows the distribution of markers significance  $-\log_{10}(P - \text{value})$  along the chromosomes.** The correction for population stratification and familial relatedness was performed by using the first three principal components ( $PC_{[1-3]}$ ) and an additive genomic relationship matrix ( $G$ ) in a linear mixed-effect model. The red dashed line marks the multiple testing criteria of false discovery rate (FDR)  $< 0.05$ , **(b) Quantile-quantile plot showing the distribution of observed versus expected (red dashed line)  $-\log_{10}(P - \text{value})$ .** The naïve model represents the GWAS without the correction of population structure, the  $PC_{[1-3]}$  model represents the population structure corrected with the first three  $PC$ s, the  $G$  model represents the familial relatedness corrected with a genomic relationship matrix, and the  $PC_{[1-3]}+G$  model represents the population structure and familial relatedness corrected with the  $PC$ s and the  $G$  matrix. The color code for different models is given in the figure legend.

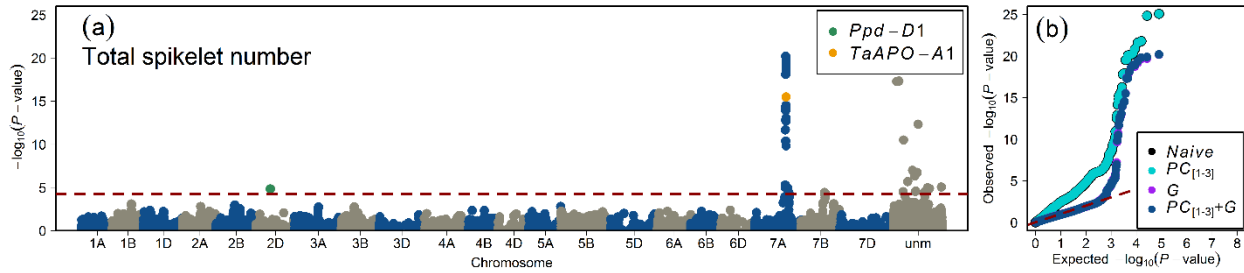

**Figure S5. Summary of the genome-wide association studies (GWAS) of total spikelet number per spike in the population of 518 elite European winter wheat varieties. (a) Manhattan plot shows the distribution of markers significance  $-\log_{10}(P - \text{value})$  along the chromosomes. The correction for population stratification and familial relatedness was performed by using the first three principal components ( $PC_{[1-3]}$ ) and an additive genomic relationship matrix ( $G$ ) in a linear mixed-effect model. The red dashed line marks the multiple testing criteria of false discovery rate (FDR)  $< 0.05$ , (b) Quantile-quantile plot showing the distribution of observed versus expected (red dashed line)  $-\log_{10}(P - \text{value})$ . The naïve model represents the GWAS without the correction of population structure, the  $PC_{[1-3]}$  model represents the population structure corrected with the first three  $PC$ s, the  $G$  model represents the familial relatedness corrected with a genomic relationship matrix, and the  $PC_{[1-3]}+G$  model represents the population structure and familial relatedness corrected with the  $PC$ s and the  $G$  matrix. The color code for different models is given in the figure legend.**

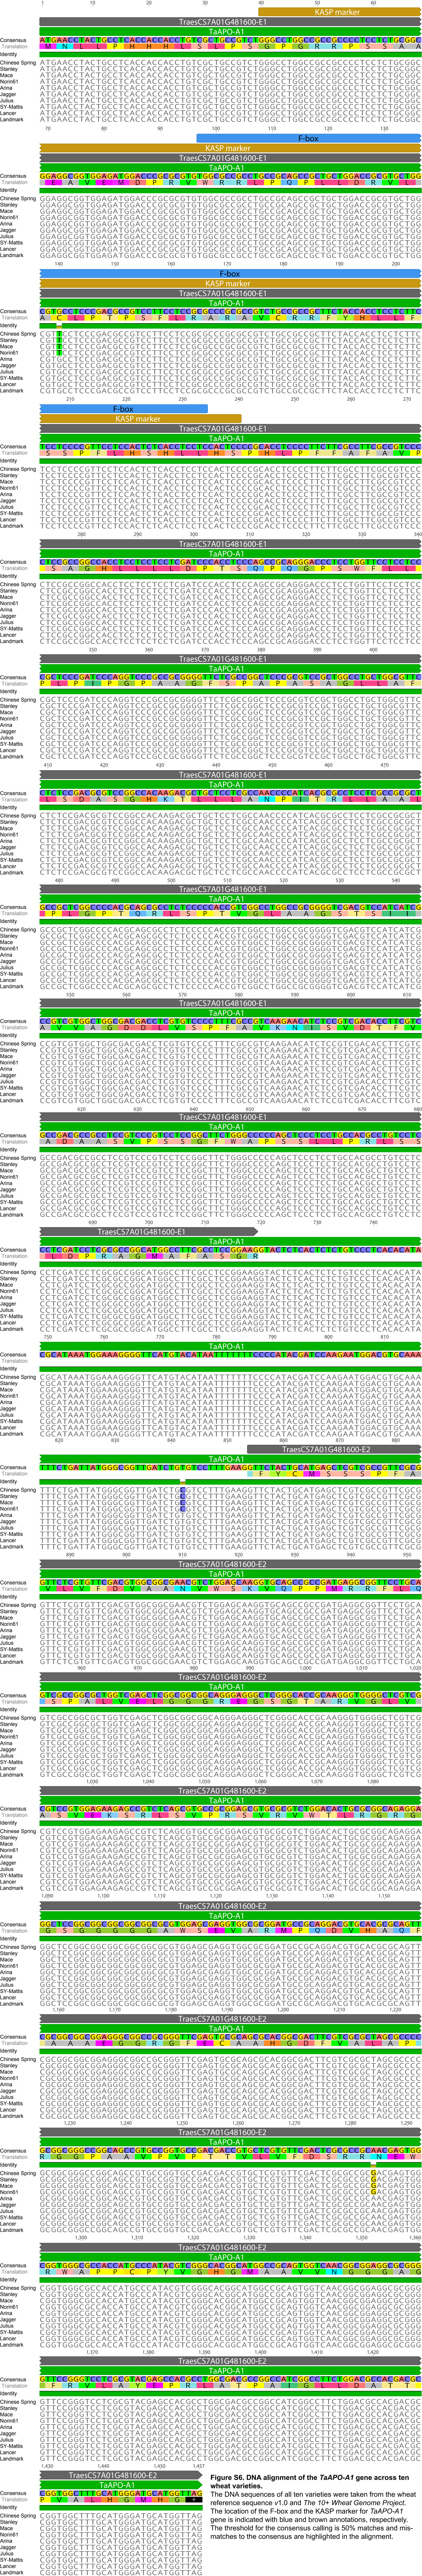

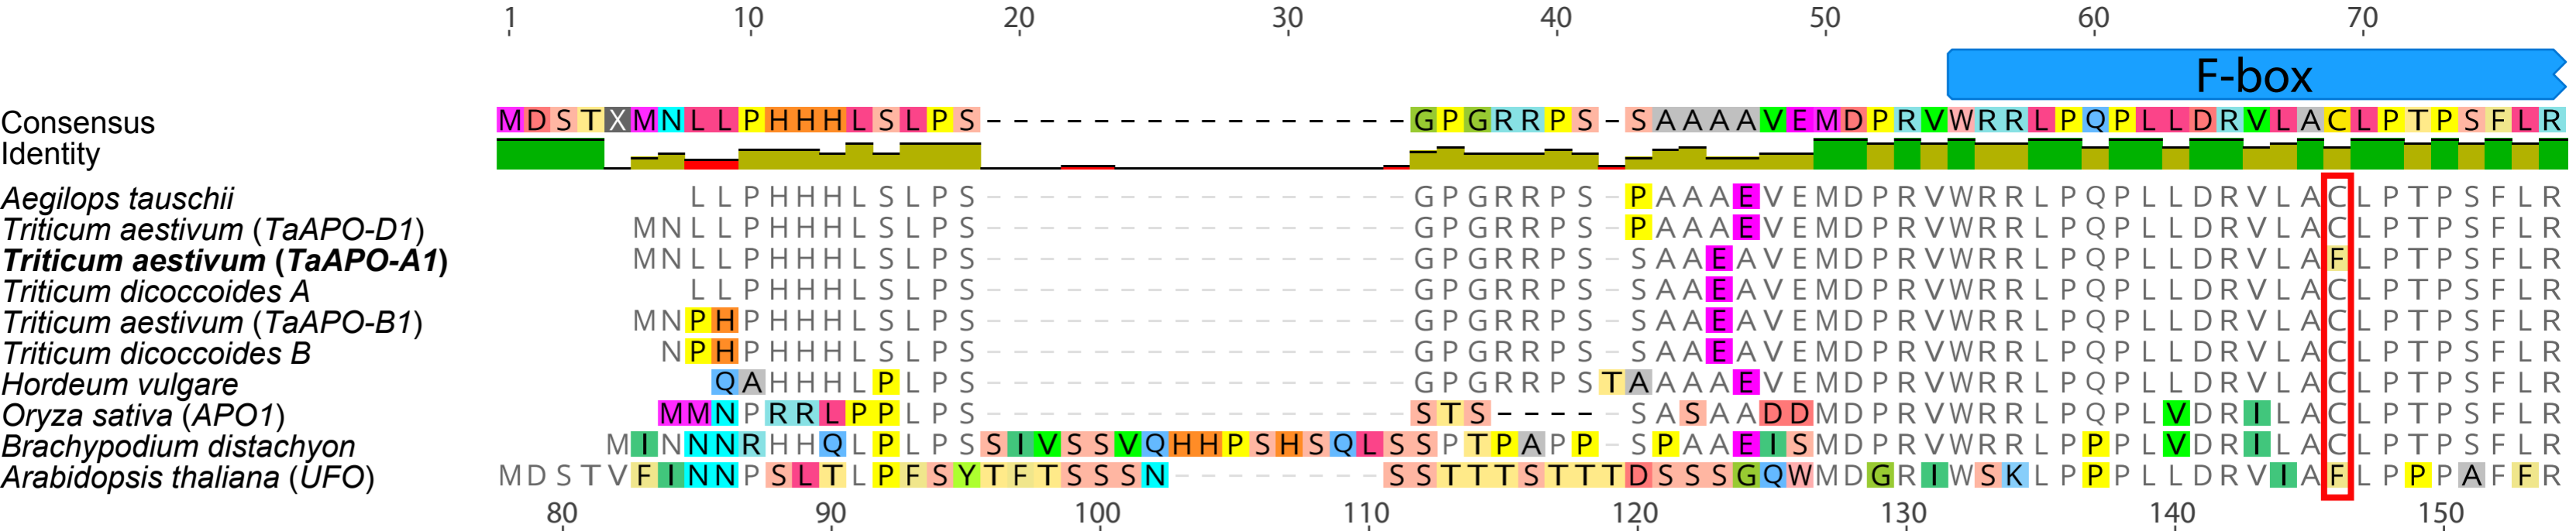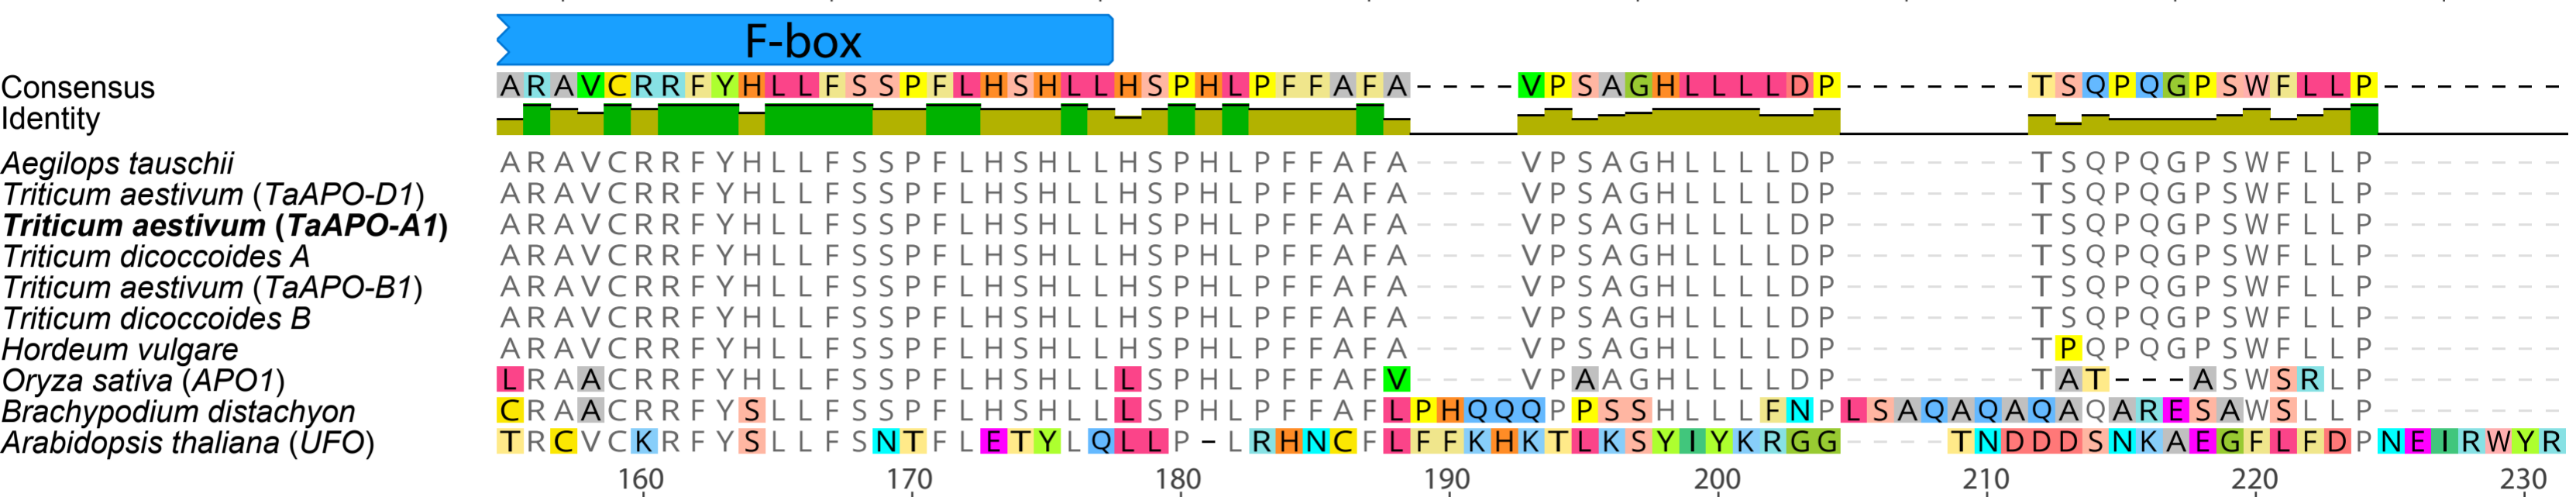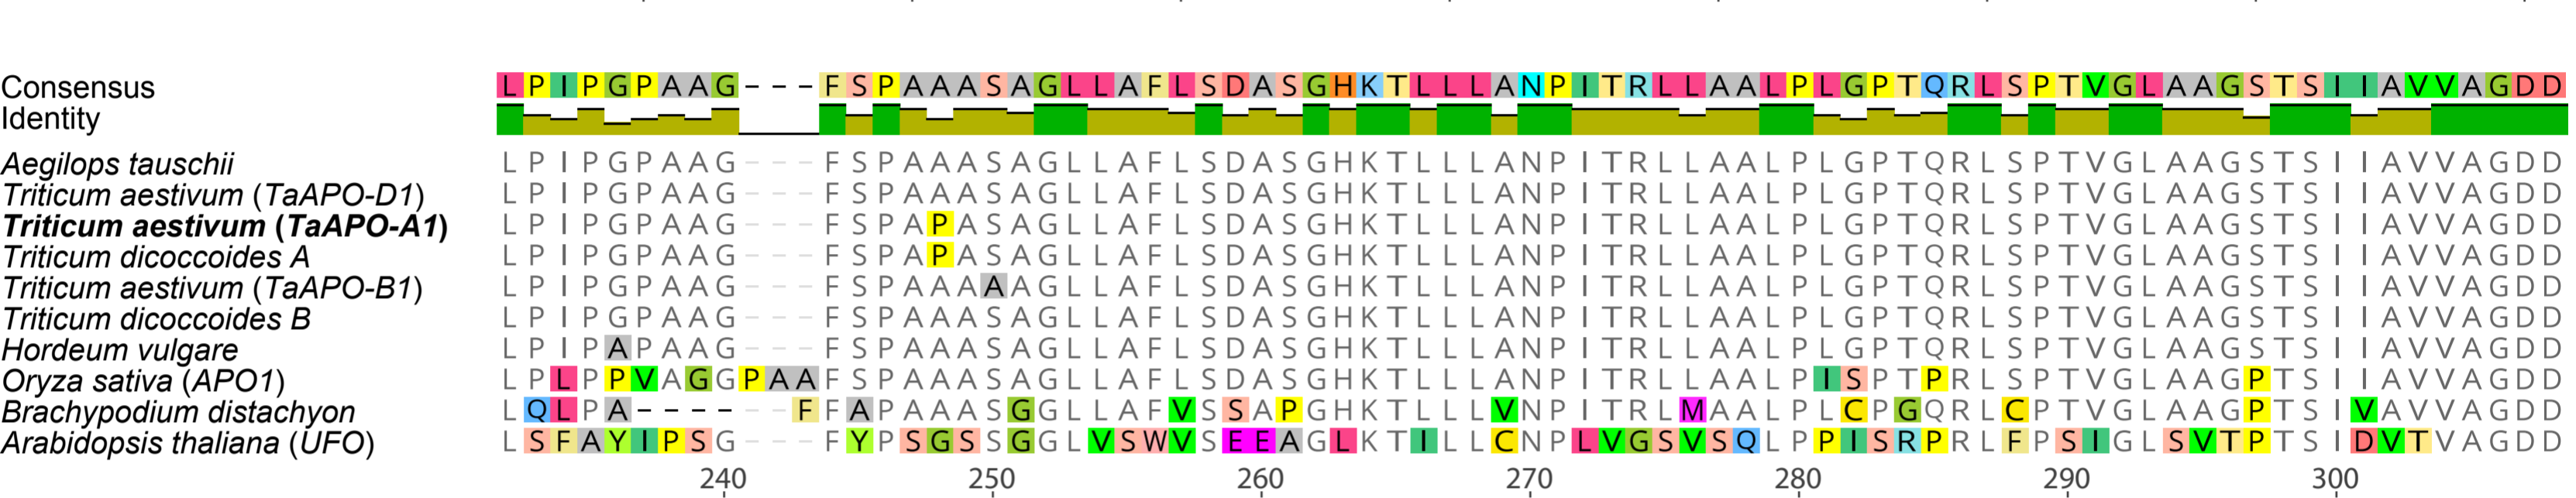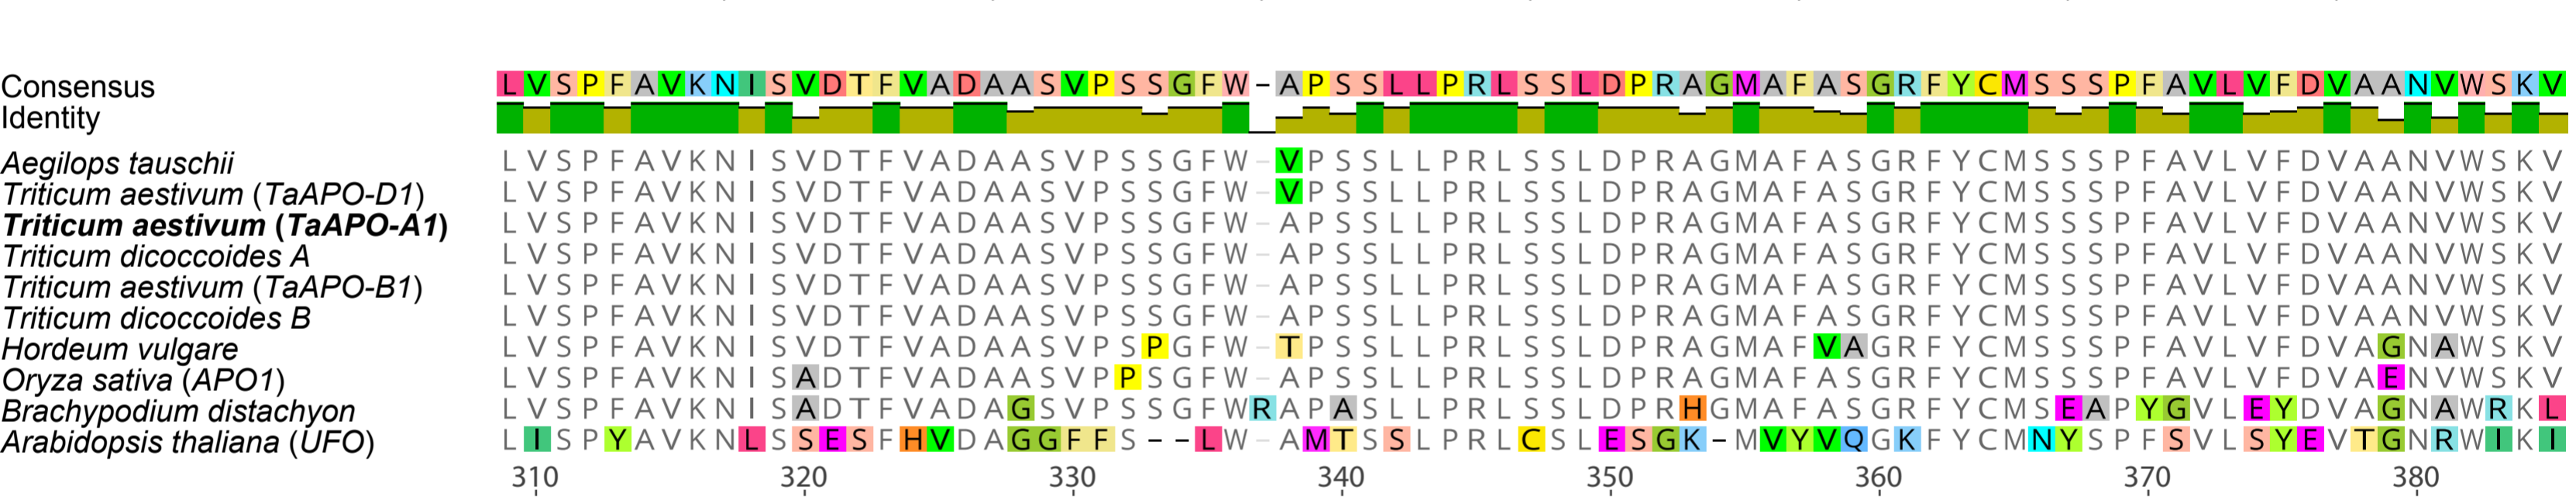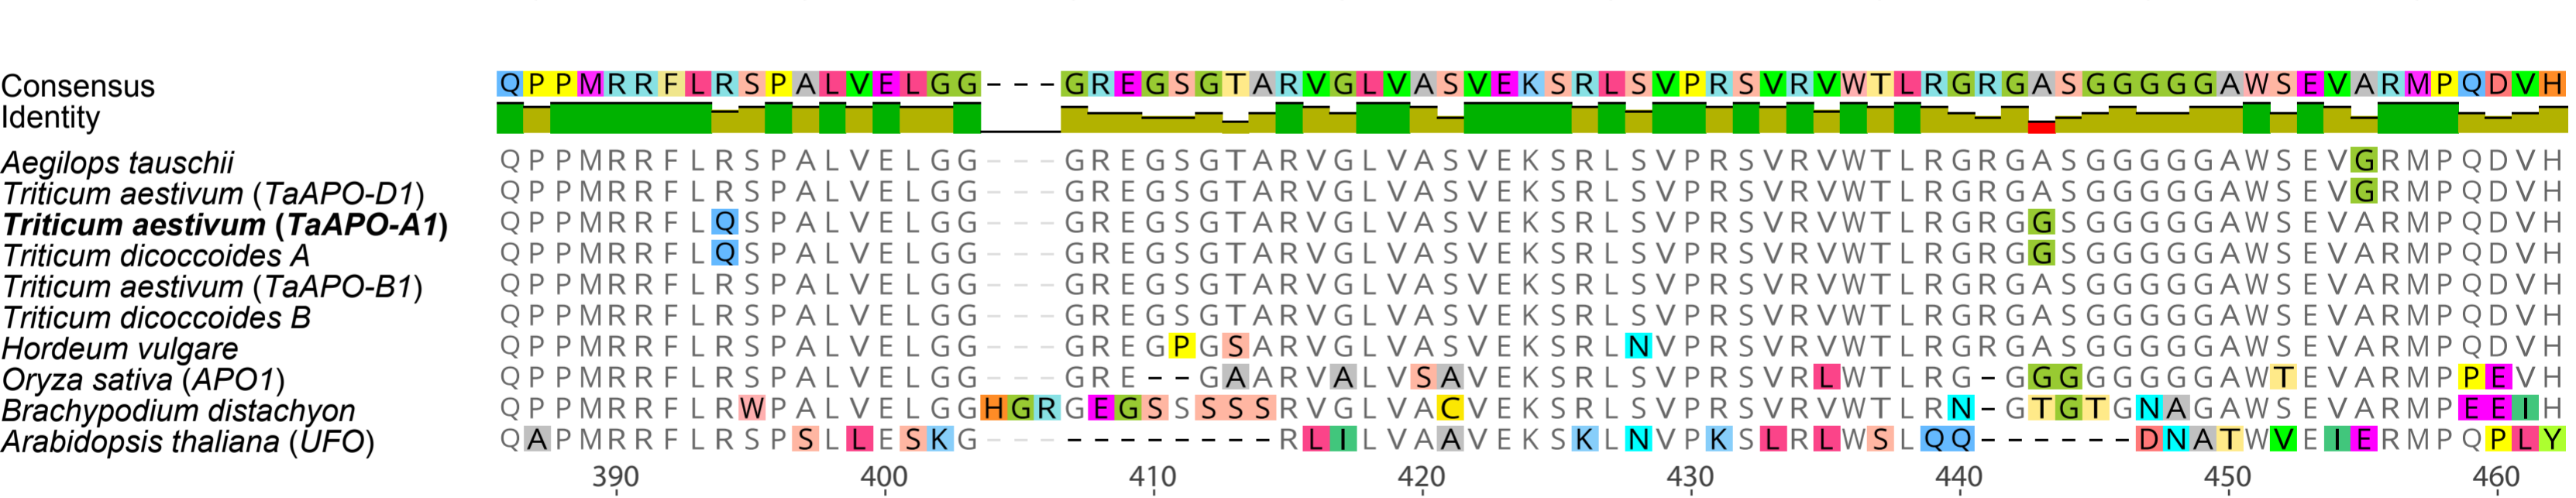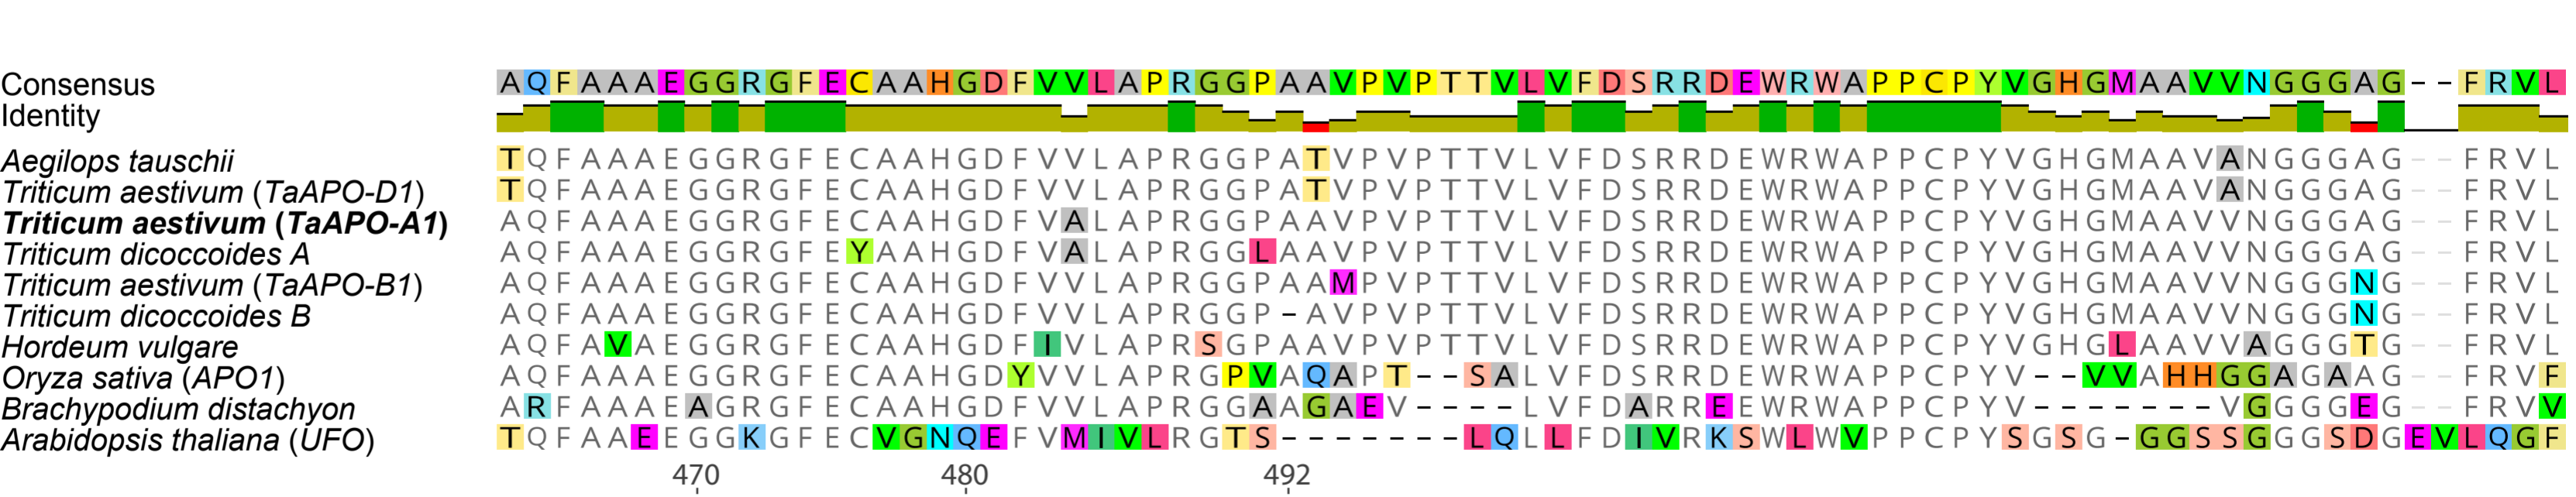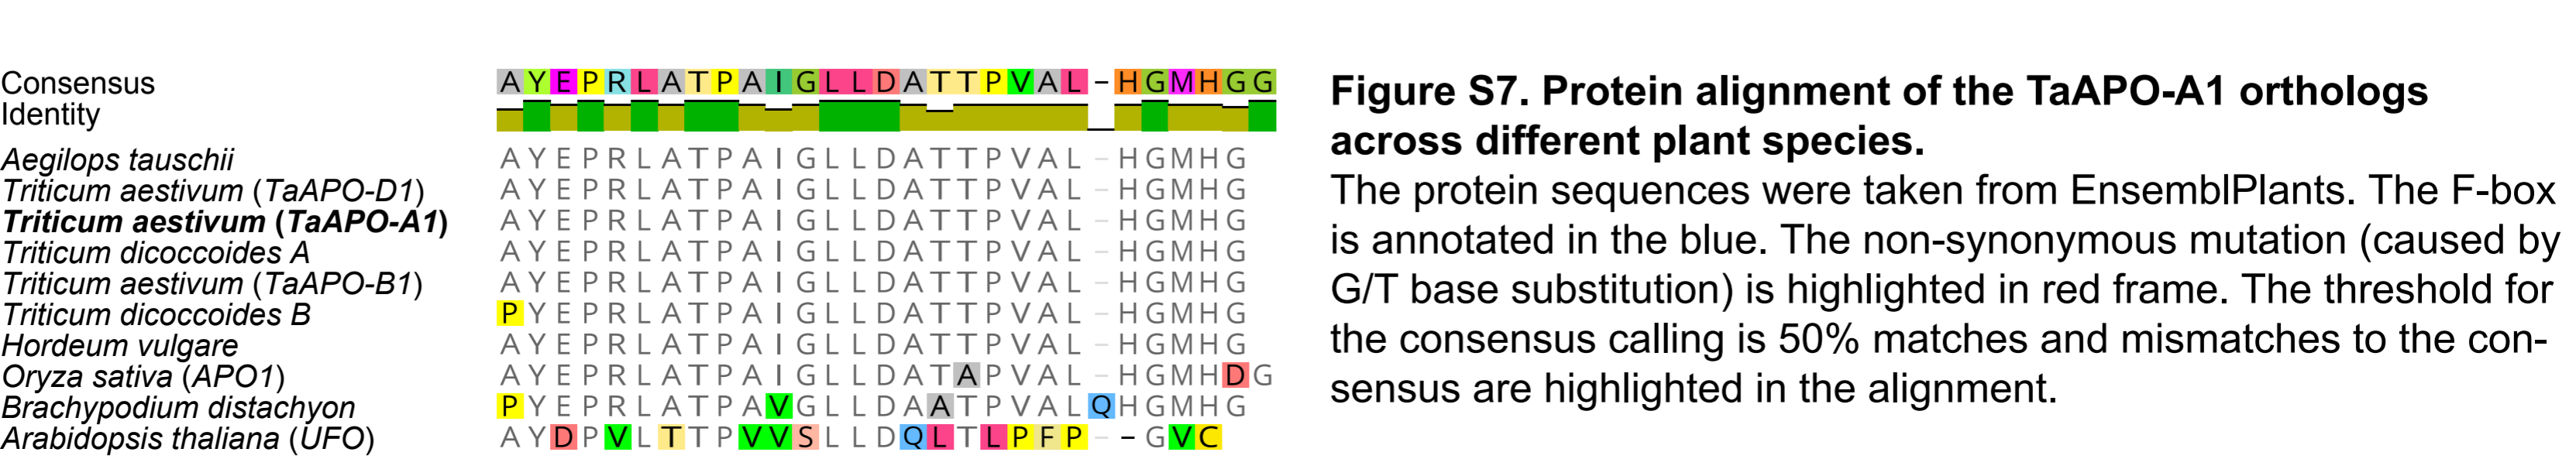

**Figure S7. Protein alignment of the TaAPO-A1 orthologs across different plant species.**

The protein sequences were taken from EnsemblPlants. The F-box is annotated in the blue. The non-synonymous mutation (caused by G/T base substitution) is highlighted in red frame. The threshold for the consensus calling is 50% matches and mismatches to the consensus are highlighted in the alignment.
